# Supplementary material
Source: PubMed Central journal article supplement (PMC7476156)
Supplement: ajtr0012-4594-f2.pdf [file ajtr0012-4594-f2.pdf]

## Remimazolam tosylate in colonoscopy

**Supplementary Table 1.** Dosage of fentanyl\*

|               | Remimazolam (N=194)  | Propofol (N=190)     | P value |
|---------------|----------------------|----------------------|---------|
| Fentanyl      |                      |                      | 0.563   |
| Mean $\pm$ SD | 62.99 $\pm$ 10.81    | 63.64 $\pm$ 11.19    |         |
| Median (IQR)  | 61.00 (55.00, 70.00) | 62.00 (55.00, 71.00) |         |
| Min~Max       | 45.00, 97.00         | 43.20, 91.80         |         |

\*Fentanyl citrate injection was administered to all patients at a dose of 1  $\mu$ g/kg before the assigned trial sedative medication. Comparison was determined by Student's t test. SD, standard deviation; IQR, interquartile range.
